# Supplementary material
Source: PubMed Central journal article supplement (PMC8766904)

## SUPPLEMENTAL MATERIAL

**Supplemental Table I.** INTERMACS Variables Included for Feature Selection

|                                        |                             |                               |
|----------------------------------------|-----------------------------|-------------------------------|
| <b>COMORBIDITIES</b>                   |                             |                               |
| CC_ALLOSENSITIZATION_M                 | CC_HIST_DRUG_USE_M          | CC_OTH_CEREBROVASC_DISEASE_M  |
| CC_CHRONIC_COAGULOPATHY                | CC_HIST_HIV                 | CC_OTH_MAJOR_PSYCH_DIAG_M     |
| CC_CHRONIC_INF_CONCERNS_M              | CC_HIST_LYMPHOMA_LEUKEMIA_M | CC_PERIPH_VASC_DISEASE_M      |
| CC_CHRONIC_RENAL_DISEASE_M             | CC_HIST_SMOKING_M           | CC_PULMONARY_DISEASE_M        |
| CC_CONTRAIN_TO_IMMSUPPRES_M            | CC_HIST_SOLID_ORGAN_CNCR_M  | CC_PULMONARY_HYPERTENSION_M   |
| CC_CURR_SMOKING_M                      | CC_LARGE_BMI_M              | CC_PX_DOES_NOT_WANT_TX_M      |
| CC_FRAILITY_M                          | CC_LIMITED_SOCIAL_SUPPORT_M | CC_RCNT_PULM_EMBOLUS_M        |
| CC_FREQUENT_ICD_SHOCKS                 | CC_LIVER_DYSFUNCTION_M      | CC_RPTD_NON_COMPLIANCE_M      |
| CC_HEP_INDUCED_THROMBO_M               | CC_LTD_COG_UNDERSTND_M      | CC_SEVERE_DEPRESSION_M        |
| CC_HISTORY_GI_ULCERS                   | CC_MAJOR_STROKE_M           | CC_SEVERE_DIABETES_M          |
| CC_HISTORY_HEPATITIS_M                 | CC_MALNUTRITION_CACHEXIA_M  | CC_THORACIC_AORTIC_DIS_M      |
| CC_HIST_ALCOHOL_ABUSE_M                | CC_MUSCSKELETAL_LIMIT_M     | CC_UNFAV_MEDIASTINAL_ANAT_M   |
| CC_HIST_ATRIAL_ARRHYTHMIA              | CC_NARCOTIC_DEPENDENCE      |                               |
| CC_HIST_BONE_MARROW_TX                 | CC_OTHER_CO_MORBIDITY_M     |                               |
| <b>CLINICAL RISK FACTORS</b>           |                             |                               |
| AGE_DEIDENT                            | BLOOD_TYPE                  | INTERVENTION_48_HRS_IABP      |
| GENDER                                 | PRIMARY_DGN                 | INTERVENTION_48_HRS_ECMO      |
| ETHNICITY                              | TIME_CARD_DGN               | INTERVENTION_48_HRS_VENTILAT  |
| RACE_AF_AMER                           | PX_PROFILE_INTERMACS        | INTERVENTION_48_HRS_ULTRAFILT |
| RACE_ASIAN                             | MODIFIER_A                  | INTERVENTION_48_HRS_DIALYSIS  |
| RACE_AM_IND                            | CURRENT_ICD                 | PREV_CARDIAC_OPER_NONE        |
| RACE_PAC_ISLAND                        | HR_RATE                     | CONCOM_SURG_AORTIC            |
| RACE_WHITE                             | SYS_BP                      | CONCOM_SURG_MITRAL            |
| BSA                                    | DIA_BP                      | CONCOM_SURG_TRICUSPID         |
| BMI                                    | IV_INO_THERAPY              |                               |
| <b>MEDICAL THERAPY</b>                 |                             |                               |
| MED_PRE_IMP_AMIODARONE                 | MED_PRE_IMP_BETA_BLOCKERS   | MED_PRE_IMP_WARFARIN          |
| MED_PRE_IMP_ACE_INHIBITORS             | MED_PRE_IMP_ALDOSTERONE     | MED_PRE_IMP_ANTEPLATELET      |
| MED_PRE_IMP_ANGIOSTENSIN               | MED_PRE_IMP_LOOP_DIURETICS  | MED_PRE_IMP_INOTROPE_INFUSION |
| <b>LABORATORY &amp; EKG &amp; ECHO</b> |                             |                               |
| BUN_MG_DL                              | WBC_X10_3_UL                | EKG_RHYTHM                    |
| CREAT_MG_DL                            | HEMOGLOBIN_G_DL             | LVEF (pre-implant)            |
| BILI_TOTAL_MG_DL                       | PLATELET_X10_3_UL           | LVEDD (pre-implant)           |
| SODIUM_MEQ_L                           | SGOT_AST                    | LVEF (post-implant)           |
| POTASSIUM_MEQ_L                        | SGPT_ALT                    | LVEDD (post-implant)          |
| ALBUMIN_G_L                            | INR                         |                               |
| <b>LVAD VARIABLES</b>                  |                             |                               |
| DEVICE_TY                              | DEVICE_STRATEGY             | LV_CENTRIFUGAL                |

**Supplemental Table II.** Training Dataset Model Performance (AUC) with or without Feature Selection

| <b>Classifier</b> | <b>With Feature Selection</b> | <b>Without Feature Selection</b> |
|-------------------|-------------------------------|----------------------------------|
| Bayesian LR       | <b>0.842</b>                  | 0.815                            |
| Linear SVM        | <b>0.834</b>                  | 0.773                            |
| GBDT              | <b>0.829</b>                  | 0.817                            |
| NN                | <b>0.833</b>                  | 0.803                            |
| RF                | <b>0.820</b>                  | 0.815                            |

Bayesian LR, Bayesian logistic regression; SVM, support vector machine; GBDT, gradient-boosted decision trees; NN, neural networks; RF, random forest.

**Supplemental Table III.** Training Dataset Model Performance (AUC) Using Various Class Balancing Methods

| <b>Classifier</b> | <b>Raw</b>   | <b>Class-weighting</b> | <b>Down-sampling</b> | <b>Smote</b> |
|-------------------|--------------|------------------------|----------------------|--------------|
| Bayesian LR       | <b>0.842</b> | 0.833                  | 0.817                | 0.832        |
| Linear SVM        | 0.710        | 0.710                  | 0.710                | <b>0.834</b> |
| GBDT              | 0.808        | 0.821                  | 0.814                | <b>0.829</b> |
| NN                | 0.829        | <b>0.833</b>           | 0.819                | 0.830        |
| RF                | 0.785        | 0.785                  | <b>0.820</b>         | 0.816        |

Bayesian LR, Bayesian logistic regression; SVM, support vector machine; GBDT, gradient-boosted decision trees; NN, neural networks; RF, random forest.

**Supplemental Table IV.** Calculation of regression-based I-CARS and simplified Topkara Recovery Score (I-TOPS) from INTERMACS Registry

**I-CARS Recovery Score**

| <u>Variables</u>                   | <u>Score:</u> |
|------------------------------------|---------------|
| Age < 50 years                     | 1             |
| Non- Ischemic HF                   | 3             |
| Time from cardiac diagnosis <2 yrs | 1             |
| Implanted ICD                      | 2             |
| Creatinine < 1.2 mg/dL             | 1             |
| <u>LVEDD &lt; 6.5 cm</u>           | <u>1</u>      |
| Total Maximum I-CARS Score:        | 9             |

**I-TOPS Recovery Score**

| <u>Variables</u>                   | <u>Score:</u> |
|------------------------------------|---------------|
| Age < 50 years                     | 1             |
| Non- Ischemic HF                   | 1             |
| Time from cardiac diagnosis <2 yrs | 1             |
| Suboptimal HF therapy*             | 1             |
| LVEDD < 6.5 cm                     | 1             |
| PASP < 50 mmHg                     | 1             |
| BUN < 30 mgdL                      | 1             |
| <u>Axial-flow device</u>           | <u>1</u>      |
| Total Maximum I-TOPS Score:        | 8             |

\* Optimal HF defined as prior or current use of at least 2 neurohormonal blocking agents from 3 major drug classes ( $\beta$ -blockers, ACE inhibitors/ARB, and aldosterone antagonists) and in combination with ICD and/or CRT device.

I-CARS Score: Wever-Pinzon O, et al. J Am Coll Cardiol. 2016 Oct 4;68(14):1540-53.

I-TOPS Score: Topkara, VK et al. Circ Heart Fail. 2016 Jul;9(7):10.1161.

**Supplemental Table V.** Machine Learning Model Parameter Tuning in the Training Dataset

| <b>Classifier</b> | <b>Tuning parameters</b>            | <b>AUC</b> |
|-------------------|-------------------------------------|------------|
| Linear SVM        | cost = 1                            | 0.834      |
| GBDT              | interaction depth=1, n of trees=50  | 0.805      |
|                   | interaction depth=1, n of trees=100 | 0.824      |
|                   | interaction depth=1, n of trees=150 | 0.829      |
|                   | interaction depth=2, n of trees=50  | 0.816      |
|                   | interaction depth=2, n of trees=100 | 0.824      |
|                   | interaction depth=2, n of trees=150 | 0.825      |
|                   | interaction depth=3, n of trees=50  | 0.827      |
|                   | interaction depth=3, n of trees=100 | 0.819      |
|                   | interaction depth=3, n of trees=150 | 0.818      |
| NN                | size=1, decay=0                     | 0.833      |
|                   | size=1, decay=0.0001                | 0.832      |
|                   | size=1, decay=0.1                   | 0.794      |
|                   | size=3, decay=0                     | 0.817      |
|                   | size=3, decay=0.0001                | 0.825      |
|                   | size=3, decay=0.1                   | 0.803      |
|                   | size=5, decay=0                     | 0.808      |
|                   | size=5, decay=0.0001                | 0.826      |
|                   | size=5, decay=0.1                   | 0.803      |
| RF                | mtry=2                              | 0.820      |
|                   | mtry=15                             | 0.792      |
|                   | mtry=28                             | 0.777      |

Linear SVM, linear support vector machine; GBDT, gradient-boosted decision trees; NN, neural networks; RF, random forest.

**Supplemental Table VI.** Predictors of LVAD Explant for Recovery by Multivariable Logistic Regression with Backward Stepwise Selection in the Training Dataset

| Clinical Variable               | B     | SE    | p-value                      | Odds Ratio (95% CI) |
|---------------------------------|-------|-------|------------------------------|---------------------|
| Current Smoking                 | 1.15  | 0.232 | <b>8.1 x 10<sup>-7</sup></b> | 3.15 (1.97 – 4.91)  |
| Current ICD                     | -0.87 | 0.188 | <b>3.4 x 10<sup>-6</sup></b> | 0.42 (0.29 – 0.61)  |
| LVEF 0 – 20 % (post)            | -0.78 | 0.178 | <b>1.1 x 10<sup>-5</sup></b> | 0.46 (0.32 – 0.65)  |
| Hemoglobin                      | 0.16  | 0.040 | <b>4.8 x 10<sup>-5</sup></b> | 1.18 (1.09 – 1.27)  |
| BUN (mg/dL)                     | -0.03 | 0.008 | <b>4.6 x 10<sup>-4</sup></b> | 0.97 (0.96 – 0.99)  |
| LVEDD (post)                    | -0.25 | 0.072 | <b>5.2 x 10<sup>-4</sup></b> | 0.78 (0.68 – 0.90)  |
| Age                             | -0.02 | 0.007 | <b>0.001</b>                 | 0.98 (0.96 – 0.99)  |
| Dilated Ischemic Cardiomyopathy | -0.63 | 0.216 | <b>0.003</b>                 | 0.53 (0.34 – 0.80)  |
| Centrifugal LVAD                | -0.70 | 0.242 | <b>0.004</b>                 | 0.50 (0.30 – 0.79)  |
| BTR Indication                  | 0.53  | 0.564 | <b>0.007</b>                 | 4.62 (1.44 – 13.5)  |
| IABP Intervention 48 hours      | -0.56 | 0.243 | <b>0.019</b>                 | 0.57 (0.35 – 0.90)  |
| Preimplant Warfarin use         | -0.46 | 0.198 | <b>0.029</b>                 | 0.63 (0.42 – 0.92)  |
| History of ETOH abuse           | 0.53  | 0.238 | <b>0.026</b>                 | 1.70 (1.05 – 2.67)  |
| Postpartum Cardiomyopathy       | 0.73  | 0.338 | <b>0.032</b>                 | 2.07 (1.04 – 3.95)  |
| Frailty                         | -1.30 | 0.610 | <b>0.033</b>                 | 0.27 (0.07 – 0.77)  |
| Time cardiac diagnosis (1M-1Y)  | 0.41  | 0.200 | <b>0.042</b>                 | 1.50 (1.01 – 2.21)  |

**Calculation of New INTERMACS LVAD Recovery Risk Score**

$$\text{Risk score} = (\beta_1 \times \text{variable}_1) + (\beta_2 \times \text{variable}_2) + \dots + (\beta_{16} \times \text{variable}_{16})$$

**New INTERMACS LVAD Recovery Risk Score  
Distribution In the Validation Dataset**

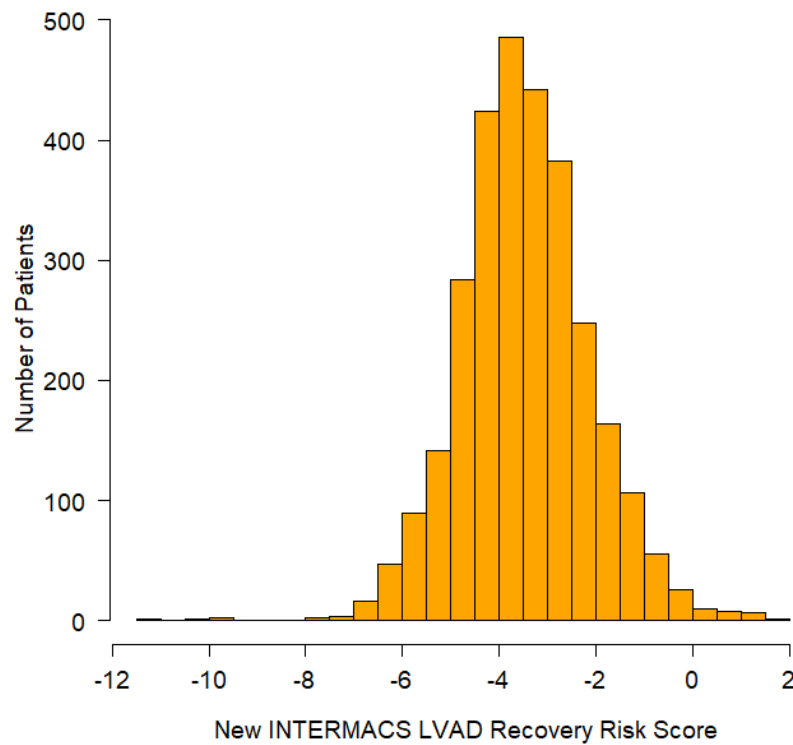



**Supplemental Figure II. LASSO feature selection.** Cross-validation curve (red dotted line) with upper and lower standard deviation curves along the  $\lambda$  sequence

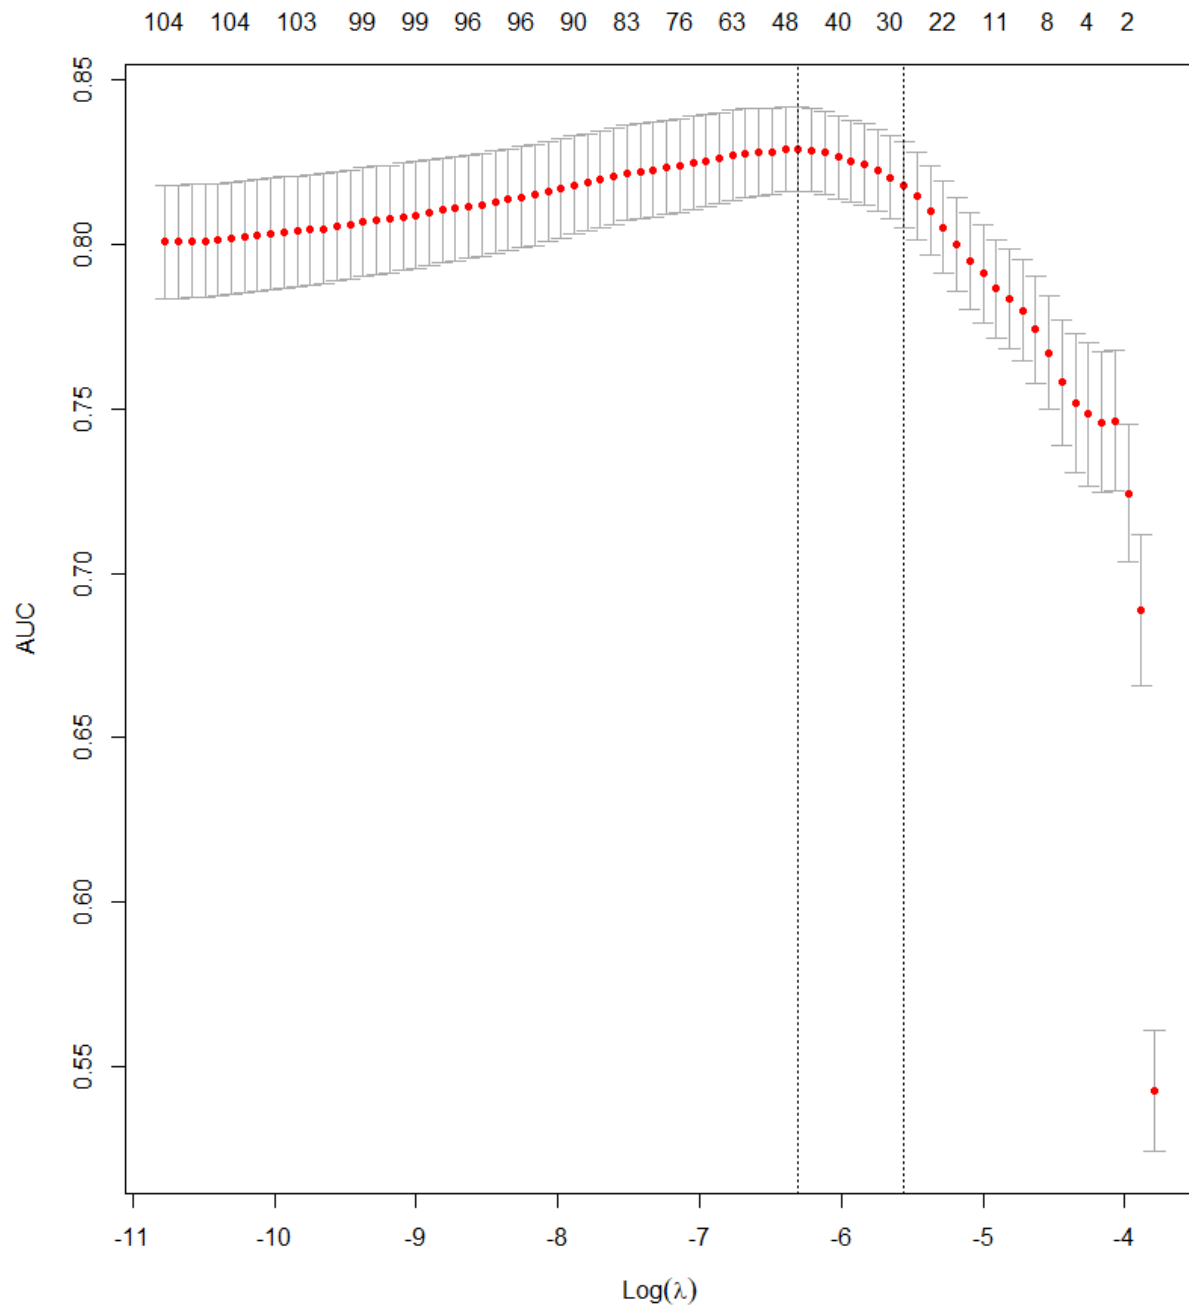



**Supplemental Figure III.** Concordance of Recovery Predictors from LASSO model (Machine Learning), conventional logistic regression-based model (New INTERMACS Score), and original simplified I-CARS and I-TOPS models shown on the heat map (green: risk factors positively associated with recovery, red: risk factors negatively associated with recovery)

|                                | LASSO | New INTERMACS Score | I-CARS Score | I-TOPS Score |
|--------------------------------|-------|---------------------|--------------|--------------|
| Age                            | Red   | Red                 | Red          | Red          |
| BTR Indication                 | Green | Green               |              |              |
| BTT Indication                 | Red   |                     |              |              |
| BUN (mg/dL)                    | Red   | Red                 |              | Red          |
| Centrifugal LVAD               | Red   | Red                 |              | Red          |
| Concomitant Tricuspid Surgery  | Red   |                     |              |              |
| Creatinine                     |       |                     | Red          | Red          |
| Current ICD                    | Red   | Red                 | Red          | Red          |
| Current Smoking                | Green | Green               |              |              |
| Dilated Ischemic               | Red   | Red                 | Red          | Red          |
| ECG Sinus Rhythm               | Green |                     |              |              |
| Frailty                        |       | Red                 |              |              |
| Heart Rate                     | Green |                     |              |              |
| Hemoglobin                     | Green | Green               |              |              |
| History of ETOH abuse          | Green | Green               |              |              |
| IABP Intervention 48 hours     | Red   | Red                 |              |              |
| INTERMACS Profile 3            | Green |                     |              |              |
| Limited Social Support         | Green |                     |              |              |
| LVEDD (post-LVAD)              | Red   | Red                 |              |              |
| LVEDD (pre-LVAD)               |       |                     | Red          |              |
| LVEF 0 – 20 % (post)           | Red   | Red                 |              |              |
| LVEF 20 – 29 % (post)          | Red   | Red                 |              |              |
| Non-compliance                 | Green |                     |              |              |
| Other Psychiatric Disease      | Green |                     |              |              |
| PA systolic pressure           |       |                     |              | Red          |
| Postpartum Cardiomyopathy      | Green | Green               |              |              |
| Preimplant Amiodarone use      | Red   |                     |              |              |
| Preimplant Warfarin use        | Red   | Red                 |              |              |
| RVAD                           | Red   | Red                 |              |              |
| Serum Sodium                   | Green |                     |              |              |
| Time cardiac diagnosis (1M-1Y) | Green | Green               | Green        | Green        |
| Time cardiac diagnosis (<1M)   | Green |                     | Green        | Green        |

**Supplemental Figure IV.** Comparison of Traditional Logistic Regression Based (New INTERMACS LVAD Recovery Risk Score) versus Machine Learning (Bayesian LR) Based LVAD Recovery Prediction Risk Model

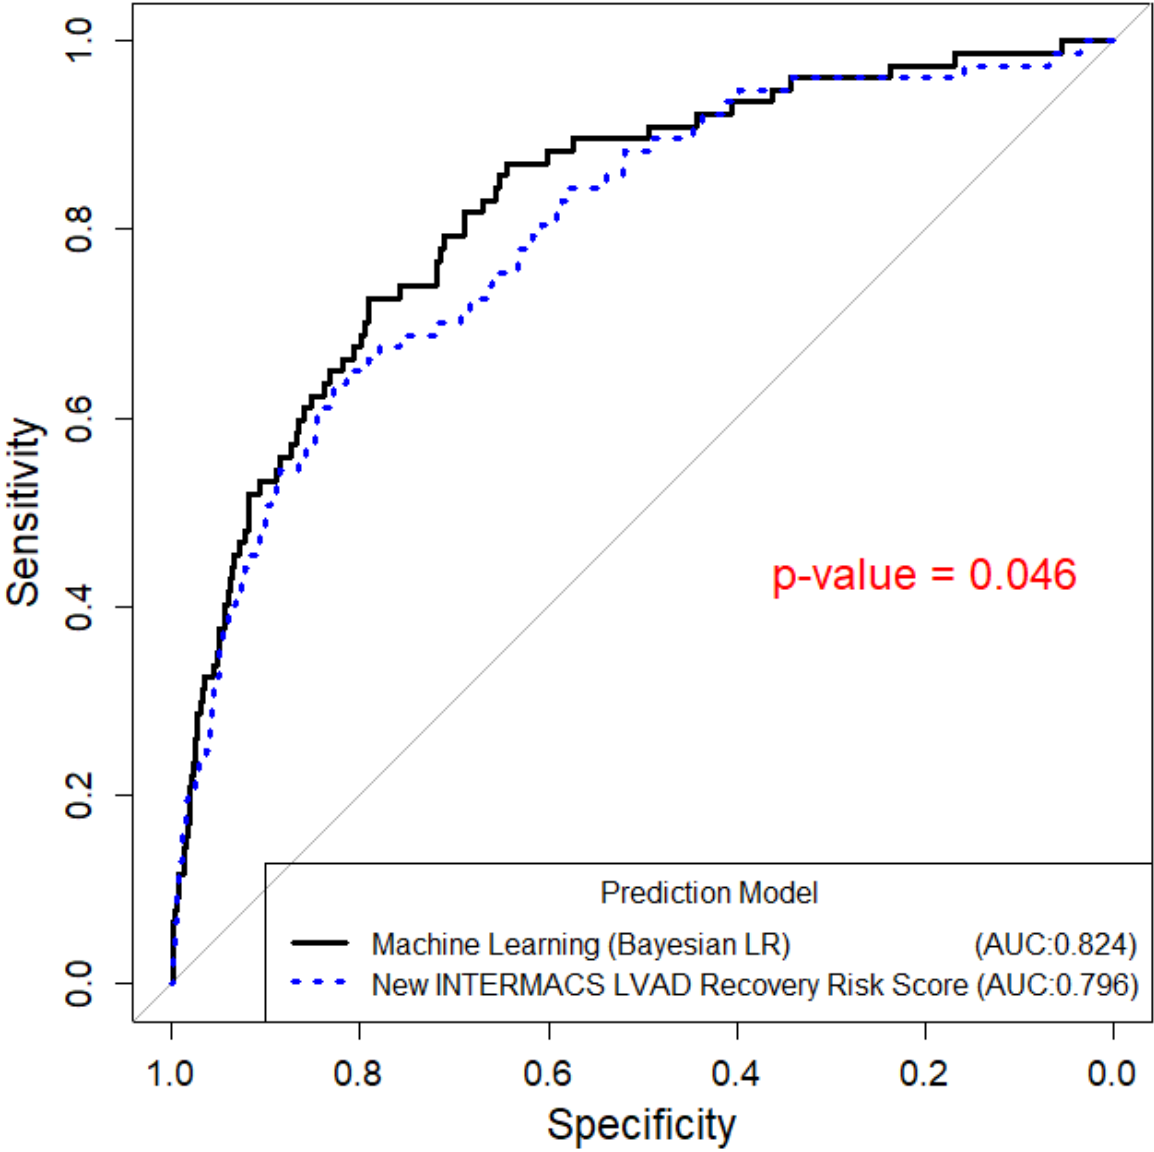

Supplement: NIHMS1750712-supplement-Supplemental_Publication_Material.pdf [file NIHMS1750712-supplement-Supplemental_Publication_Material.pdf]
